# Supplementary material for: Decomposition of the simplest ketohydroperoxide in the ozonolysis of ethylene
Source: Royal Society of Chemistry journal article supplement (doi:10.1039/d0cp02798g), 2020-01-01
Supplement: d0cp02798g1.pdf [file d0cp02798g1.pdf]

## Supplementary Material

### Decomposition of the simplest ketohydroperoxide in the ozonolysis of ethylene

Nadav Genossar<sup>a,b</sup>, Jessica P. Porterfield<sup>c</sup> and Joshua H. Baraban<sup>a</sup>

<sup>a</sup> Department of Chemistry, Ben Gurion University of the Negev, Beer Sheva, Israel

<sup>b</sup> IAEC, Tel Aviv, Israel

<sup>c</sup> Center for Astrophysics | Harvard & Smithsonian, MA, USA

All coordinates are given in Å and rotational constants and frequencies in cm<sup>-1</sup>. All calculations were performed at the FC-CCSD(T)/ANO1 level of theory, unless mentioned differently.

Cis-HPA geometry (AE-CCSDT(T)/PCVQZ):

|   |              |              |              |
|---|--------------|--------------|--------------|
| H | -0.653307753 | -1.393890498 | -0.001262273 |
| O | -1.34100672  | -0.798261467 | -0.331838814 |
| O | -1.063996348 | 0.364103221  | 0.48197313   |
| C | -0.04699031  | 1.06863575   | -0.171591385 |
| H | 0.076022752  | 2.001251373  | 0.384339065  |
| H | -0.325043289 | 1.318662502  | -1.200942329 |
| C | 1.26966643   | 0.333226734  | -0.191012174 |
| O | 1.411117208  | -0.795455637 | 0.212365884  |
| H | 2.117823115  | 0.897104898  | -0.617817185 |

Be-B<sub>0</sub> (FC-CCSDT(T)/ANO0), ordered A to C according to main text):

0.00129742  
0.00335065  
0.00178410

Vibrational frequencies:

| Harmonic Frequency<br>(FC-CCSD(T)/ANO1) | Anharmonic Contribution<br>(FC-CCSD(T)/ANO0) | Fundamental<br>Frequency |
|-----------------------------------------|----------------------------------------------|--------------------------|
| 169.61                                  | -13.62                                       | 155.99                   |
| 201.02                                  | -12.44                                       | 188.58                   |
| 281.53                                  | -8.64                                        | 272.90                   |
| 424.68                                  | -7.97                                        | 416.71                   |
| 482.57                                  | -64.20                                       | 418.37                   |
| 705.44                                  | -12.92                                       | 692.53                   |
| 809.29                                  | -24.87                                       | 784.42                   |
| 844.35                                  | -23.71                                       | 820.65                   |
| 886.65                                  | -11.10                                       | 875.55                   |
| 1087.66                                 | -27.64                                       | 1060.03                  |
| 1131.83                                 | -28.34                                       | 1103.49                  |
| 1277.94                                 | -32.86                                       | 1245.08                  |
| 1389.99                                 | -47.00                                       | 1342.99                  |
| 1401.48                                 | -38.82                                       | 1362.67                  |
| 1409.73                                 | -43.14                                       | 1366.59                  |
| 1437.06                                 | -28.75                                       | 1408.31                  |
| 1781.81                                 | -19.81                                       | 1762.00                  |
| 2946.85                                 | -156.32                                      | 2790.53                  |
| 3022.13                                 | -131.94                                      | 2890.18                  |
| 3082.24                                 | -154.29                                      | 2927.95                  |
| 3726.50                                 | -191.86                                      | 3534.64                  |

Trans-HPA geometry (AE-CCSDT(T)/PCVQZ):

|   |              |              |              |
|---|--------------|--------------|--------------|
| H | 2.285550766  | 0.667103097  | -0.765010022 |
| O | 1.592064706  | 0.821748645  | -0.114000845 |
| O | 1.272647989  | -0.545144633 | 0.252799323  |
| C | -0.012850583 | -0.780259582 | -0.273844829 |
| H | -0.241040581 | -1.811574149 | 0.003103947  |
| H | -0.036172572 | -0.68695306  | -1.360368363 |
| C | -1.052089235 | 0.131078713  | 0.34260864   |
| O | -2.145592041 | 0.286386991  | -0.137197346 |
| H | -0.741248344 | 0.62603373   | 1.27810432   |

Be-B<sub>0</sub> (FC-CCSDT(T)/ANO0), ordered A to C according to main text):

-0.00325843  
0.00179559  
0.00140359

Harmonic frequencies:

| Harmonic Frequency<br>(FC-CCSD(T)/ANO1) | Anharmonic Contribution<br>(FC-CCSD(T)/ANO0) | Fundamental<br>Frequency |
|-----------------------------------------|----------------------------------------------|--------------------------|
| 75.65                                   | -5.62                                        | 70.03                    |
| 164.93                                  | -6.03                                        | 158.90                   |
| 217.43                                  | -48.30                                       | 169.13                   |
| 309.36                                  | -5.66                                        | 303.71                   |
| 428.89                                  | -10.22                                       | 418.66                   |
| 574.04                                  | -11.53                                       | 562.51                   |
| 738.76                                  | -11.44                                       | 727.32                   |
| 856.91                                  | -31.04                                       | 825.87                   |
| 1059.79                                 | -26.82                                       | 1032.97                  |
| 1070.30                                 | -32.09                                       | 1038.21                  |
| 1120.42                                 | -29.22                                       | 1091.19                  |
| 1267.73                                 | -29.69                                       | 1238.05                  |
| 1334.46                                 | -41.11                                       | 1293.34                  |
| 1367.06                                 | -3.42                                        | 1363.65                  |
| 1411.61                                 | -35.94                                       | 1375.68                  |
| 1447.58                                 | -46.30                                       | 1401.29                  |
| 1789.35                                 | -35.60                                       | 1753.75                  |
| 2966.25                                 | -153.97                                      | 2812.28                  |
| 3047.26                                 | -132.51                                      | 2914.75                  |
| 3106.18                                 | -152.29                                      | 2953.89                  |
| 3788.68                                 | -196.63                                      | 3592.06                  |

Cis-formylmethoxy geometry:

|   |              |              |              |
|---|--------------|--------------|--------------|
| O | -1.406974549 | 0.570635736  | 0.014210298  |
| C | -0.729905806 | -0.614479997 | -0.012546925 |
| C | 0.791993008  | -0.513563324 | 0.016763261  |
| H | -1.073785518 | -1.31702047  | 0.763559918  |
| H | -1.00490631  | -1.09725981  | -0.970177624 |
| H | 1.302539524  | -1.496308971 | 0.069768475  |
| O | 1.409298992  | 0.522068414  | -0.008750803 |

Rotational constants:

0.7014478404

0.2036150749

0.1625260286

Harmonic frequencies:

134

263

592

724

848

901

1080

1180

1298

1369

1412

1800

2913

2929

2986

Trans-formylmethoxy geometry:

|   |              |              |              |
|---|--------------|--------------|--------------|
| O | -1.730451594 | 0.2344304    | -0.146329008 |
| C | -0.609473816 | -0.49964484  | 0.12540543   |
| C | 0.656165141  | 0.353942605  | 0.168703982  |
| H | -0.752914977 | -0.87737853  | 1.157572893  |
| H | -0.476352247 | -1.375874093 | -0.520658157 |
| H | 0.49504439   | 1.391597176  | 0.512934857  |
| O | 1.741684683  | -0.070826856 | -0.146774158 |

Rotational constants:

1.2771117744

0.1529822308

0.1438598490

Harmonic frequencies:

103

338

506

673

987

1002

1104

1136

1252

1368

1397

1787

2909

2963

30393
